# Supplementary material for: Stepped-wedge cluster randomised controlled trial to assess the effectiveness of an electronic medication management system to reduce medication errors, adverse drug events and average length of stay at two paediatric hospitals: a study protocol
Source: PubMed Central journal article supplement — BMJ Open. 2016 Oct 21;6(10):e011811. doi: 10.1136/bmjopen-2016-011811 (PMC5093386; doi:10.1136/bmjopen-2016-011811), 2016-10-21
Supplement: bmjopen-2016-011811supp.pdf [file bmjopen-2016-011811supp.pdf]

MAR Full screen Print 0 minutes ago

.All Medications (System) 22 June 2016 07:00 - 25 June 2016 08:17 (Clinical Range)

| Time View                                                             | Medications                                                                                                                                                                                                    | 22/06/2016<br>18:35 | 22/06/2016<br>21:40 | 22/06/2016<br>22:42 | 23/06/2016<br>07:55 | 23/06/2016<br>07:56 | 23/06/2016<br>07:57 | 23/06/2016<br>07:58 | 23/06/2016<br>08:49                          | 23/06/2016<br>18:00                          | 24/06/2016<br>08:00                           | 24/06/2016<br>18:00                          | 25/06/2016<br>08:00                           |
|-----------------------------------------------------------------------|----------------------------------------------------------------------------------------------------------------------------------------------------------------------------------------------------------------|---------------------|---------------------|---------------------|---------------------|---------------------|---------------------|---------------------|----------------------------------------------|----------------------------------------------|-----------------------------------------------|----------------------------------------------|-----------------------------------------------|
| <input checked="" type="checkbox"/> Scheduled                         | <b>Scheduled</b>                                                                                                                                                                                               |                     |                     |                     |                     |                     |                     |                     |                                              |                                              |                                               |                                              |                                               |
| <input checked="" type="checkbox"/> Unscheduled                       | <b>esomeprazole</b><br>2.5 mg, Oral, daily, reflux<br>Disperse ONE sachet in 15mL of water and give 3.8mL (=2.5mg)                                                                                             |                     |                     |                     |                     |                     |                     |                     |                                              | 2.5 mg<br>Last given:<br>23/06/2016<br>07:58 |                                               |                                              | 2.5 mg<br>Last given:<br>23/06/2016<br>07:58  |
| <input checked="" type="checkbox"/> PRN                               | esomeprazole                                                                                                                                                                                                   |                     |                     |                     |                     |                     | 2.5 mg              |                     |                                              |                                              |                                               |                                              |                                               |
| <input checked="" type="checkbox"/> Continuous Infusions              | <b>ferrous sulfate (Ferro-Liquid 150 mg/5 mL oral solution (=6 mg/mL iron))</b><br>2 mL, Oral, BD, Treatment of iron deficiency anaemia<br>Give on an empty stomach - 30 minutes before or 2 hours after food. |                     |                     |                     |                     |                     |                     |                     |                                              | 2 mL<br>Last given:<br>23/06/2016<br>07:58   | 2 mL<br>Last given:<br>23/06/2016<br>07:58    | 2 mL<br>Last given:<br>23/06/2016<br>07:58   | 2 mL<br>Last given:<br>23/06/2016<br>07:58    |
| <input checked="" type="checkbox"/> Future                            | ferrous sulfate                                                                                                                                                                                                |                     | * 2 mL              |                     |                     |                     |                     | * 2 mL              |                                              |                                              |                                               |                                              |                                               |
| <input checked="" type="checkbox"/> Discontinued Scheduled            | <b>levetiracetam</b><br>100 mg, Oral, BD, seizures<br>100mg/mL oral liquid                                                                                                                                     |                     |                     |                     |                     |                     |                     |                     |                                              | 100 mg<br>Last given:<br>23/06/2016<br>07:56 | 100 mg<br>Last given:<br>23/06/2016<br>07:56  | 100 mg<br>Last given:<br>23/06/2016<br>07:56 | 100 mg<br>Last given:<br>23/06/2016<br>07:56  |
| <input checked="" type="checkbox"/> Discontinued Unscheduled          | levetiracetam                                                                                                                                                                                                  |                     |                     |                     |                     | 100 mg              |                     |                     |                                              |                                              |                                               |                                              |                                               |
| <input checked="" type="checkbox"/> Discontinued PRN                  | <b>Multivitamin (multivitamin (Penta-Vite Infant 0-3 Years) oral drop)</b><br>0.45 mL, Oral, daily, multivitamin supplement<br>*FRIDGE* Discard 9 weeks after opening.                                         |                     |                     |                     |                     |                     |                     |                     |                                              |                                              | 0.45 mL<br>Last given:<br>23/06/2016<br>07:57 |                                              | 0.45 mL<br>Last given:<br>23/06/2016<br>07:57 |
| <input checked="" type="checkbox"/> Discontinued Continuous Infusions | Multivitamin                                                                                                                                                                                                   |                     |                     |                     |                     |                     | 0.45 mL             |                     |                                              |                                              |                                               |                                              |                                               |
|                                                                       | <b>phenobarbitone</b><br>15 mg, Oral, BD, seizures<br>S4D - Recordable. Monitor trough levels.                                                                                                                 |                     |                     |                     |                     |                     |                     |                     |                                              | 15 mg<br>Last given:<br>23/06/2016<br>07:55  | 15 mg<br>Last given:<br>23/06/2016<br>07:55   | 15 mg<br>Last given:<br>23/06/2016<br>07:55  | 15 mg<br>Last given:<br>23/06/2016<br>07:55   |
|                                                                       | phenobarbitone                                                                                                                                                                                                 | 15 mg               |                     |                     | 15 mg               |                     |                     |                     |                                              |                                              |                                               |                                              |                                               |
|                                                                       | Phenobarbitone Level                                                                                                                                                                                           |                     |                     |                     |                     |                     |                     |                     |                                              |                                              |                                               |                                              |                                               |
|                                                                       | <b>PRN</b>                                                                                                                                                                                                     |                     |                     |                     |                     |                     |                     |                     |                                              |                                              |                                               |                                              |                                               |
|                                                                       | <b>midazolam</b><br>1.5 mg, Buccal, As Indicated, PRN seizure > 5 minutes, Prolonged seizure activity<br>Target Dose: midazolam 0.3 mg/kg (Actual Dose: 0.2793 mg/kg) 22/06/2016 17:07:52*Standardized*        |                     |                     |                     |                     |                     |                     |                     | 1.5 mg<br>Not given within<br>5 days.        |                                              |                                               |                                              |                                               |
|                                                                       | midazolam                                                                                                                                                                                                      |                     |                     |                     |                     |                     |                     |                     |                                              |                                              |                                               |                                              |                                               |
|                                                                       | <b>ondansetron</b><br>0.5 mg, Oral, 8 hourly, PRN nausea & vomiting<br>4mg/2mL vial. Infuse over at least 15 minutes Target Dose: ondansetron 0.1 mg/kg (Actual Dose: 0.1...                                   |                     |                     |                     |                     |                     |                     |                     | 0.5 mg<br>Not given within<br>5 days.        |                                              |                                               |                                              |                                               |
|                                                                       | ondansetron                                                                                                                                                                                                    |                     |                     |                     |                     |                     |                     |                     |                                              |                                              |                                               |                                              |                                               |
|                                                                       | <b>oxycodone</b><br>0.2 mg, Oral, 6 hourly, PRN pain, pain, Immediate release formulation<br>Target Dose: oxycodone 0.1 mg/kg (Actual Dose: 0.0372 mg/kg) 21/06/2016 10:46:34                                  |                     |                     |                     |                     |                     |                     |                     | 0.2 mg<br>Last given:<br>22/06/2016<br>05:20 |                                              |                                               |                                              |                                               |
|                                                                       | oxycodone                                                                                                                                                                                                      |                     |                     |                     |                     |                     |                     |                     |                                              |                                              |                                               |                                              |                                               |
|                                                                       | Pain Score                                                                                                                                                                                                     |                     |                     |                     |                     |                     |                     |                     |                                              |                                              |                                               |                                              |                                               |
|                                                                       | PRN Response                                                                                                                                                                                                   |                     |                     |                     |                     |                     |                     |                     |                                              |                                              |                                               |                                              |                                               |
| Therapeutic Class View                                                |                                                                                                                                                                                                                |                     |                     |                     |                     |                     |                     |                     |                                              |                                              |                                               |                                              |                                               |
| Route View                                                            |                                                                                                                                                                                                                |                     |                     |                     |                     |                     |                     |                     |                                              |                                              |                                               |                                              |                                               |

Example of a medication administration screen

Details for **oxycodone (oxycodone 5 mg/5 mL oral solution)** Send To: Select Routing ...

Details
Order Comments

| *Dose  | *Route of Administration | *Frequency | Duration | *Dispense | *Refill |
|--------|--------------------------|------------|----------|-----------|---------|
| 2.3 mL | Oral                     | 4 hourly   |          | 25 mL     | 0       |

Drug Form: [ ]

Physician Address: [ ]

Physician Contact Number: [ ]

PBS Status/Approval Number: NON-PBS

Repeat Interval (days): [ ]

\*Start Date/Time: 23/06/2016 0854

\*PRN: pain

Indication: [ ]

Dose Limit: [ ]

PBS Script Number: [ ]

Age/weight range: [ ]

Type Of Therapy:  Acute  Maintenance

Special Instructions: Maximum of 6 doses in 24 hours

PBS Code: [ ]

PBS Restriction ID: [ ]

Requested Refill Date: [ ] [ ] [ ]

\*Stop Date: 27/06/2016

Example of a medication order screen in the eMM system
